# Supplementary material for: Simultaneous Versus Sequential Initiation of Lixisenatide and Basal Insulin for Type 2 Diabetes: Subgroup Analysis of a Japanese Post-Marketing Surveillance Study of Lixisenatide (PRANDIAL)
Source: Springer Nature journal article supplement (doi:10.1007/s12325-022-02311-1), 2022-10-07
Supplement: MOESM1 [file 23581672]

**Simultaneous versus Sequential Initiation of Lixisenatide and Basal Insulin for Type 2  
Diabetes: Subgroup Analysis of a Japanese Post-Marketing Surveillance Study of  
Lixisenatide (PRANDIAL)**

**Supplementary Material**

**Authors:** Hideaki Kaneto<sup>a</sup>, Mike Baxter<sup>b, c</sup>, Yoko Takahashi<sup>d</sup>, Yasuo Terauchi<sup>e</sup>

**Affiliations:**

<sup>a</sup>Kawasaki Medical School, Kawasaki, Japan

<sup>b</sup>Medical Affairs, Sanofi, Reading, UK

<sup>c</sup>Swansea University, Swansea, Wales, UK

<sup>d</sup>Sanofi K.K. General Medicine Medical Department, Tokyo, Japan

<sup>e</sup>Department of Endocrinology and Metabolism, Yokohama City University, Kanazawa-ku,  
Yokohama, Japan

**Corresponding author:** Yoko Takahashi

Email: [Yoko.Takahashi@sanofi.com](mailto:Yoko.Takahashi@sanofi.com)

**Supplementary Table S1** Post-prandial plasma glucose (PPG) levels according to timing of basal insulin (BI) relative to initiation of lixisenatide (Lixi) treatment in a subgroup of patients with PPG data

| PPG level, mean $\pm$ SD (mg/dL) <sup>a</sup> | All (n = 250)     | BI timing subgroups   |                   |                                   |                                    | No BI (n = 81)    |
|-----------------------------------------------|-------------------|-----------------------|-------------------|-----------------------------------|------------------------------------|-------------------|
|                                               |                   | Before Lixi (n = 103) | Same day (n = 41) | +1 to +90 days after Lixi (n = 5) | $\geq$ 91 days after Lixi (n = 20) |                   |
| Baseline                                      | 213.8 $\pm$ 91.8  | 223.0 $\pm$ 101.3     | 230.9 $\pm$ 83.2  | 152.6 $\pm$ 28.3                  | 204.1 $\pm$ 76.2                   | 199.7 $\pm$ 86.8  |
| Change from baseline at Week 24               | -56.0 $\pm$ 96.4  | -53.5 $\pm$ 98.0      | -90.3 $\pm$ 97.0  | 55.6 $\pm$ 99.0                   | -30.8 $\pm$ 80.5                   | -55.0 $\pm$ 91.5  |
| Change from baseline at Week 156              | -51.2 $\pm$ 93.7  | -52.0 $\pm$ 104.7     | -62.0 $\pm$ 87.1  | -18.2 $\pm$ 11.4                  | -36.5 $\pm$ 74.8                   | -50.5 $\pm$ 89.6  |
| <i>p</i> -value <sup>b</sup>                  | <b>&lt;0.0001</b> | <b>&lt;0.0001</b>     | <b>&lt;0.0001</b> | <b>0.0236</b>                     | <b>0.0422</b>                      | <b>&lt;0.0001</b> |

<sup>a</sup>PPG values are an aggregate of postprandial blood glucose measurements with timing at 1h (0.5–1.4h) after a meal, 2h (1.5–2.4h) after a meal, postprandial (other), or at an unknown time point at the time of data collection

<sup>b</sup>*p*-values derived from paired t-test comparing change from baseline with baseline value. Significant *p*-values are shown in bold

BI basal insulin, *h* hour, Lixi lixisenatide, PPG postprandial plasma glucose, SD standard deviation

**Supplementary Fig. S1** Subgroups of study participants receiving concomitant lixisenatide and basal insulin according to the time interval between the start of lixisenatide and basal insulin administration

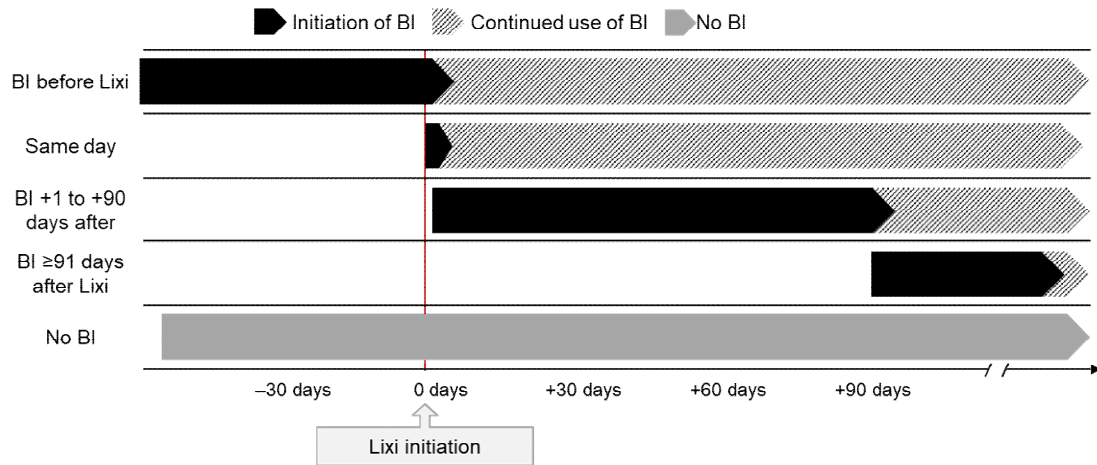

*BI* basal insulin, *Lixi* lixisenatide

**Supplementary Fig. S2 Study participant disposition and subgroups**

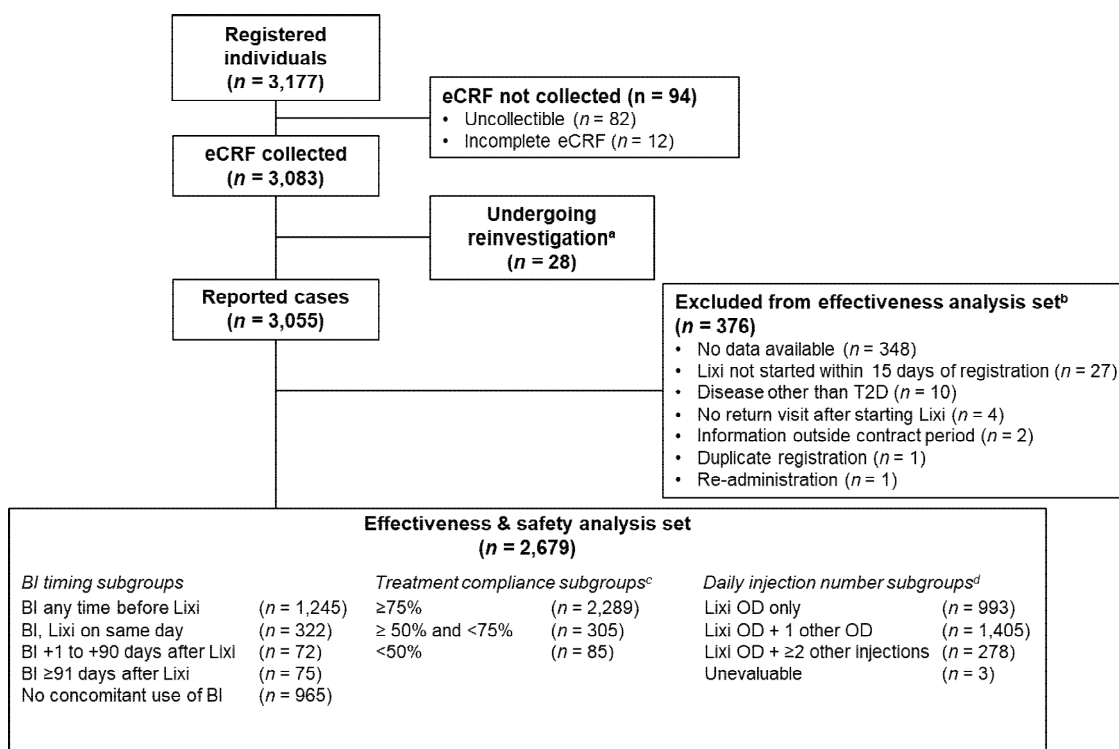

<sup>a</sup>During data extraction for this analysis, additional enquiries were required for 28 cases where data were missing or appeared incorrect, therefore these cases were excluded

<sup>b</sup>More than one reason for exclusion from analysis could apply to an individual

<sup>c</sup>Compliance status at 6 months after the start of administration of lixisenatide

<sup>d</sup>Number of injections per day at the start of lixisenatide administration, where ≥2 daily refers to other injected diabetic medications

*BI* basal insulin, *eCRF* electronic case report form, *Lixi* lixisenatide, *OD* once daily, *T2D* type 2 diabetes

**Supplementary Fig. S3** The proportion of participants in each subgroup with treatment response. Treatment response was defined as an HbA1c of <7.0% [<53 mmol/mol] at week 156 (LOCF analysis in the effectiveness analysis population). Of the 3 participants for whom daily injection number data were missing (not shown), 1 demonstrated a response to treatment

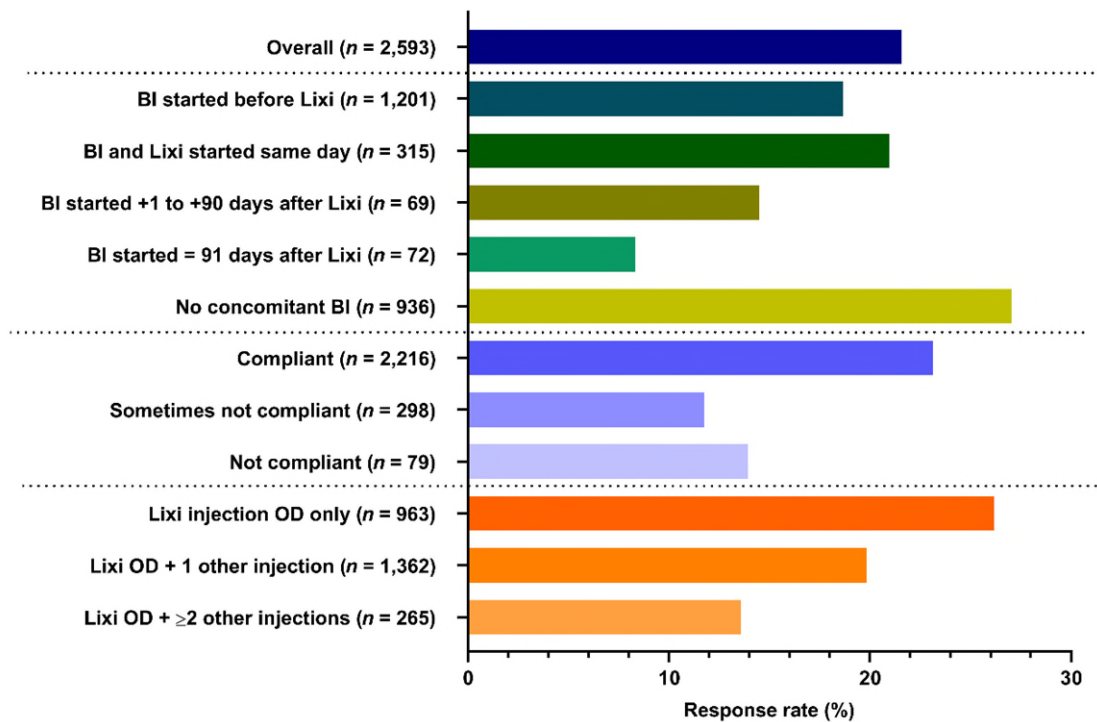

BI basal insulin, HbA1c glycated hemoglobin, Lixi lixisenatide, LOCF last observation carried forward, OD once daily
